October 2013

# PSYCHIATRIC SERVICES

A Journal of the  
American Psychiatric  
Association

- ◆ *DSM-5* Field Trial Report:  
Positive Feedback From  
Clinicians and Patients
- ◆ Impact of Parity Laws:  
Two Reports Focus on  
Changes in Service Use
- ◆ Assessing Recovery:  
A Systematic Review  
of Current Measures
- ◆ APA Achievement Awards:  
Four Exemplary Programs  
Honored at the 2013 IPS

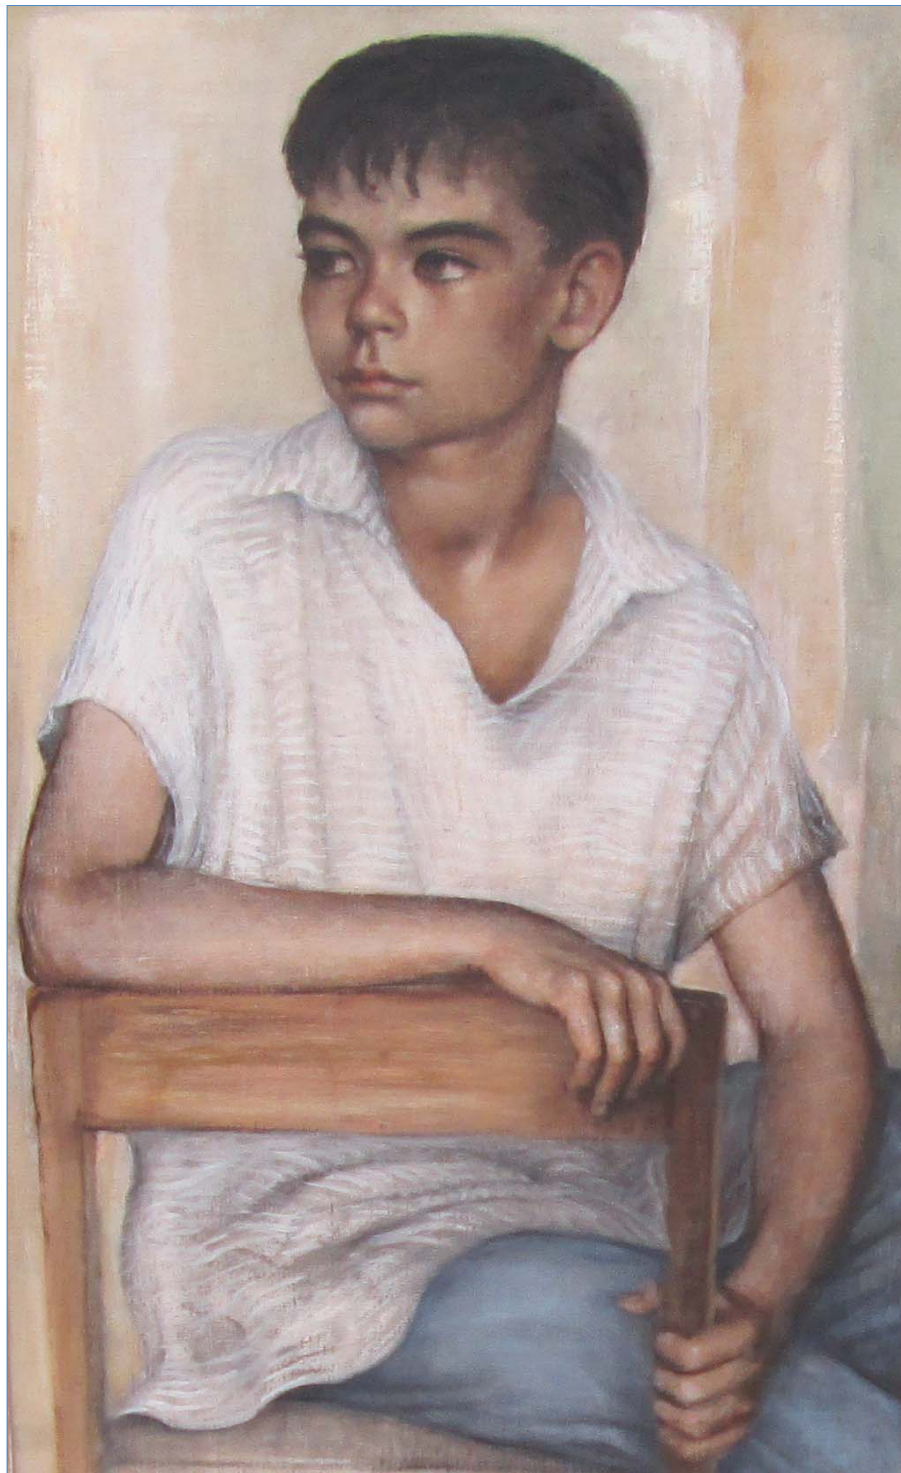

Source: http://ps.psychiatryonline.org/doi/suppl/10.1176/ps.2013.64.issue-10/suppl_file/cover.pdf
