# TAKING ISSUE

## What Do We Expect From Parity?

Two articles in this month's issue explore the impact of parity laws on different potential outcomes. One looks at access, and the other examines quality of care. Bilaver and Jordan found no impact of parity on access to autism services as measured by service use. Wallace and McConnell found a significant increase in outpatient follow-up after hospital discharge, a quality measure based on utilization. Most studies of the quality and access outcomes of parity have mixed results.

Questions about the impact of parity sometimes remind me of the old saw about the patient who asks a surgeon, "Will I be able to play the violin after my operation?" The surgeon replies, "Yes, of course." And the patient exclaims, "Wonderful, I always wanted to be able to play a musical instrument!"

The primary purpose of behavioral health insurance parity is to improve financial protection. Parity is intended to reduce out-of-pocket expenses for the treatment of a mental disorder to the point where those expenses are no more burdensome than would be expected for treating a general medical condition. The fundamental reason we have health insurance is to protect us against catastrophic health care expenditures that might be bankrupting. Parity evens the coverage for behavioral health conditions and general medical and surgical care. It is an issue of fairness.

As these two articles in this issue indicate, our expectations for health insurance parity are high. We expect considerably more than fairness in financial protection. For years it has been argued that dropping discriminatory cost-sharing insurance requirements would result in an increase in the probability of service use. But that has not usually been the case. Then, when managed care was introduced to control spending in tandem with parity, some argued that quality would improve with individualized treatment planning. Others were just hopeful that such utilization management would not withhold needed care and reduce quality. For the most part, the improvements in quality attributable to parity have been modest.

As for me, I am gratified that parity means that we enjoy improved insurance protection at no increase in cost—with some hope of improved access and better quality. I may not be able to play the violin, but at least my behavioral health care will not bankrupt me.—HOWARD H. GOLDMAN, M.D., PH.D., Editor, *Psychiatric Services*

*Psychiatric Services*, established in 1950, is published monthly by the American Psychiatric Association for mental health professionals and others concerned with treatment and services for persons with mental illnesses and mental disabilities, in keeping with APA's objectives to improve care and treatment, to promote research and professional education in psychiatric and related fields, and to advance the standards of all psychiatric services and facilities.

### Editor

Howard H. Goldman, M.D., Ph.D.

### Editorial Board

David A. Adler, M.D.  
Regina Bussing, M.D., M.S.H.S.  
Javier I. Escobar, M.D.  
Stephen M. Goldfinger, M.D.  
Richard K. Harding, M.D.  
Roberto Lewis-Fernández, M.D.  
Grayson S. Norquist, M.D., M.S.P.H.  
Martha Sajatovic, M.D.  
Gregory E. Simon, M.D., M.P.H.  
T. Scott Stroup, M.D., M.P.H.  
Marvin S. Swartz, M.D.  
Marcia Valenstein, M.D., M.S.

### Editor Emeritus

John A. Talbott, M.D.

### Book Review Editor

Jeffrey L. Geller, M.D., M.P.H.

### Contributing Editors

Paul S. Appelbaum, M.D., *Law & Psychiatry*  
José Miguel Caldas de Almeida, M.D., and Matt Muijen, M.D., Ph.D., *Global Mental Health Reform*  
Francine Cournois, M.D., and Stephen M. Goldfinger, M.D., *Frontline Reports*  
Lisa B. Dixon, M.D., M.P.H., and Brian Hepburn, M.D., *Research and Services Partnerships*  
Jeffrey L. Geller, M.D., M.P.H., *Personal Accounts*  
Marcela Horvitz-Lennon, M.D., *Best Practices*  
Amy M. Kilbourne, Ph.D., M.P.H., and Tami L. Mark, Ph.D., *Datapoints*  
Fred C. Osher, M.D., and Marvin S. Swartz, M.D., *State Mental Health Policy*  
Jules M. Ranz, M.D., and Susan M. Deakins, M.D., *Case Studies in Public-Sector Leadership*  
Steven S. Sharfstein, M.D., Haiden A. Huskamp, Ph.D., and Alison Evans Cuellar, Ph.D., *Economic Grand Rounds*

### Statistical Consultant

Deborah R. Medoff, Ph.D.

### Editorial Consultants

Joseph M. Cerimele, M.D.  
Julie M. Donohue, Ph.D.  
Robert E. Drake, M.D., Ph.D.  
M. Susan Ridgely, J.D.  
Laura Van Tosh

### Editorial Staff

Constance Grant Gartner, *Managing Editor*  
Demarie S. Jackson, *Associate Editor*  
Kathleen Stearman, *Associate Editor*  
Wendy Lieberman Taylor, *Production Manager*  
Y. Nicole Gray, *Editorial Support Services Manager*

### Publisher

Rebecca D. Rinehart

### American Psychiatric Association

Jeffrey A. Lieberman, M.D., *President*  
Paul Summergrad, M.D., *President-Elect*  
Maria A. Oquendo, M.D., *Secretary*  
David Fassler, M.D., *Treasurer*  
Melinda Young, M.D., *Speaker, APA Assembly*  
James H. Scully, M.D., *Medical Director and CEO*
